# Supplementary material
Source: HighWire-hosted journal article supplement (https://emj.bmj.com/content/38/11/808)
Supplement: inline-supplementary-material-1 [file inline-supplementary-material-1.pdf]

| <b>HEART Score</b>           |                                                         |   |
|------------------------------|---------------------------------------------------------|---|
| <b>History</b>               | Highly suspicious                                       | 2 |
|                              | Moderately suspicious                                   | 1 |
|                              | Slightly or nonsuspicious                               | 0 |
| <b>ECG</b>                   | Acute ischemia                                          | 2 |
|                              | LBBB, RBBB, LVH, PM                                     | 1 |
|                              | No signs of acute ischemia                              | 0 |
| <b>Age</b>                   | ≥ 65 years                                              | 2 |
|                              | 45 – 65 years                                           | 1 |
|                              | ≤ 45 years                                              | 0 |
| <b>Risk factors</b>          | ≥ 3 risk factors, or history of atherosclerotic disease | 2 |
|                              | 1 or 2 risk factors                                     | 1 |
|                              | No risk factors known                                   | 0 |
| <b>Troponin</b>              | > 42 ng/L                                               | 2 |
|                              | 15-42 ng/L                                              | 1 |
|                              | ≤ 14 ng/L                                               | 0 |
| <b>RULE-OUT REQUIRES:</b>    |                                                         |   |
| <b>HEART Score ≤3 points</b> |                                                         |   |

### Appendix, Table 1. HEART Score

Risk factors= Diabetes mellitus, current or recent (<30 days) smoker, hypertension, hypercholesterolemia, and family history of coronary artery disease.

| <b>HEART Score</b>  |                                                         |   |
|---------------------|---------------------------------------------------------|---|
| <b>History</b>      | Highly suspicious                                       | 2 |
|                     | Moderately suspicious                                   | 1 |
|                     | Slightly or nonsuspicious                               | 0 |
| <b>ECG</b>          | Acute ischemia                                          | 2 |
|                     | LBBB, RBBB, LVH, PM                                     | 1 |
|                     | No signs of acute ischemia                              | 0 |
| <b>Age</b>          | ≥ 65 years                                              | 2 |
|                     | 45 – 65 years                                           | 1 |
|                     | ≤ 45 years                                              | 0 |
| <b>Risk factors</b> | ≥ 3 risk factors, or history of atherosclerotic disease | 2 |
|                     | 1 or 2 risk factors                                     | 1 |
|                     | No risk factors known                                   | 0 |
| <b>Troponin</b>     | > 42 ng/L                                               | 2 |
|                     | 15-42 ng/L                                              | 1 |
|                     | ≤ 14 ng/L                                               | 0 |

#### **HEART 0h/1h PATHWAY RULE-OUT REQUIRES:**

**HEART Score ≤3 points**

**AND**

**0h hs-cTnT < 5 ng/L,**

**OR**

**0h hs-cTnT < 12 ng/L with a 1h increase < 3ng/ L**

#### **Appendix, Table 2. HEART Pathway**

Risk factors= Diabetes mellitus, current or recent (<30 days) smoker, hypertension, hypercholesterolemia, and family history of coronary artery disease.

| <b>EDACS Score</b>                                                                                                       |     |
|--------------------------------------------------------------------------------------------------------------------------|-----|
| <b>Male sex</b>                                                                                                          | +6  |
| <b>Age</b>                                                                                                               |     |
| 18-45                                                                                                                    | +2  |
| 46-50                                                                                                                    | +4  |
| 51-55                                                                                                                    | +6  |
| 56-60                                                                                                                    | +8  |
| 61-65                                                                                                                    | +10 |
| 66-70                                                                                                                    | +12 |
| 71-75                                                                                                                    | +14 |
| 76-80                                                                                                                    | +16 |
| 81-86                                                                                                                    | +18 |
| 86+                                                                                                                      | +20 |
| <b>Aged 18-50 years and either</b><br>known coronary artery disease <sup>  </sup><br>or<br>≥ 3 risk factors <sup>‡</sup> | +4  |
| <b>Symptoms and signs</b>                                                                                                |     |
| Diaphoresis                                                                                                              | +3  |
| Radiates to arm or shoulder                                                                                              | +5  |
| Pain worsened with inspiration                                                                                           | -4  |
| Pain is reproduced by palpation                                                                                          | -6  |
| <b>EDACS 0h/1h-ADP RULE-OUT REQUIRES:</b>                                                                                |     |
| <b>EDACS &lt; 16 points</b>                                                                                              |     |
| <i>AND</i>                                                                                                               |     |
| <b>No sign of acute ischemia on the ECG</b>                                                                              |     |
| <i>AND</i>                                                                                                               |     |
| <b>0h hs-cTnT &lt; 5 ng/L,</b>                                                                                           |     |
| <i>OR</i>                                                                                                                |     |
| <b>0h hs-cTnT &lt; 12 ng/L with a 1h increase &lt; 3ng/L</b>                                                             |     |

### Appendix, Table 3. EDACS

EDACS= Emergency Department Assessment of Chest pain Score, ADP= Accelerated Diagnostic

Protocol, hs-cTnT= high-sensitivity troponin T, ECG= electrocardiography.

|| Coronary artery disease (CAD) defined as previous acute myocardial infarction, coronary artery bypass graft or percutaneous coronary intervention. #Risk factors = family history of premature CAD, dyslipidemia, diabetes, hypertension, and current smoker.

|                                   | Patients included n=939 | Patients excluded n=228 | p-value |
|-----------------------------------|-------------------------|-------------------------|---------|
| <b>General information</b>        |                         |                         |         |
| Age, years mean, SD               | 60.6 (17.4)             | 60.4 (18.4)             | 0.91    |
| Male sex                          | 514 (54.7%)             | 124 (54.4%)             | 0.92    |
|                                   |                         |                         |         |
| <b>History of</b>                 |                         |                         |         |
| Previous myocardial infarction    | 188 (20.0%)             | 46 (20.2%)              | 0.96    |
| Previous angina                   | 197 (21.0%)             | 42 (18.4%)              | 0.39    |
| Previous revascularisation – CABG | 81 (8.6%)               | 20 (8.8%)               | 0.94    |
| Previous revascularization – PCI  | 164 (17.5%)             | 38 (16.7%)              | 0.78    |
| Diabetes mellitus type 1 or 2     | 134 (14.3%)             | 28 (12.3%)              | 0.44    |
| Hypertension                      | 415 (44.2%)             | 91 (39.9%)              | 0.24    |

#### Appendix, Table 4. Comparison between included and excluded patients

\*Values are mean (SD) or n (%).

SD – standard deviation, CABG- coronary artery bypass graft, PCI- percutaneous coronary intervention, ADP inhibitor- Adenosine diphosphate receptor inhibitor, ACE/ARB blocker- Angiotensin=converting enzyme inhibitor/ Angiotensin II receptor blocker, ECG- electrocardiogram, ACS- acute coronary syndrome, MACE- major adverse cardiac event

|                                                              | <b>Sensitivity %</b><br>(95% CI) | <b>NPV %</b><br>(95% CI) |
|--------------------------------------------------------------|----------------------------------|--------------------------|
| <b><i>Early presenters (≤3h)</i></b>                         |                                  |                          |
| HEART score ≤3 and 0h hs-cTnT <5 ng/L, n= 83                 | 100.0 (92.0-100.0)               | 100.0 (95.6-100.0)       |
| EDACS<16 and non-ischemic ECG and 0h hs-cTnT <5 ng/L, n= 77  | 97.7 (88.0-99.9)                 | 98.7 (91.6-99.8)         |
| <b><i>Late presenters (&gt;3h)</i></b>                       |                                  |                          |
| HEART score ≤3 and 0h hs-cTnT <5 ng/L, n= 178                | 100.0 (94.9-100.0)               | 100.0 (97.9-100.0)       |
| EDACS<16 and non-ischemic ECG and 0h hs-cTnT <5 ng/L, n= 174 | 97.6 (91.7-99.7)                 | 98.9 (95.9-99.7)         |

**Appendix, Table 5** Performance of the HEART score and the EDACS-ADP combined with a 0h hs-cTnT <5 ng/L for ruling out 30-day MACE in patients presenting early (≤3h) vs late (>3h).

\*Values are presented as proportions with 95% confidence intervals. 932 included patients, data on chest pain onset missing in seven.

EDACS= Emergency Department Assessment of Chest pain Score

ADP= Accelerated Diagnostic Protocol

hs-cTnT= troponin T

MACE – major adverse cardiac events

CI – confidence interval

NPV=negative predictive value
